# Supplementary material
Source: HighWire-hosted journal article supplement (https://erj.ersjournals.com/content/57/3/1902061)
Supplement: inline-supplementary-material-2 [file inline-supplementary-material-2.pdf]

Supplemental tables 1a Prevention-protocol pulmonary histology assessment

| Group             | Animal      | Perivascular/vascular inflammation | Perivascular fibrosis | Smooth muscle hypertrophy |
|-------------------|-------------|------------------------------------|-----------------------|---------------------------|
| 1<br>Vehicle      | 1           | 0                                  | 0                     | 2                         |
|                   | 2           | 2                                  | 1                     | 4                         |
|                   | 3           | 1                                  | 1                     | 4                         |
|                   | 4           | 0                                  | 0                     | 4                         |
|                   | 5           | 1                                  | 1                     | 4                         |
|                   | 6           | 2                                  | 1                     | 4                         |
|                   | 7           | 1                                  | 1                     | 4                         |
| <b>Mean score</b> | <b>5.42</b> |                                    |                       |                           |

| Group                       | Animal      | Perivascular/vascular inflammation | Perivascular fibrosis | Smooth muscle hypertrophy |
|-----------------------------|-------------|------------------------------------|-----------------------|---------------------------|
| 2<br>PT2567<br>100mg<br>/kg | 1           | 0                                  | 0                     | 2                         |
|                             | 2           | 1                                  | 0                     | 3                         |
|                             | 3           | 1                                  | 0                     | 3                         |
|                             | 4           | 0                                  | 0                     | 2                         |
|                             | 5           | 0                                  | 0                     | 3                         |
|                             | 6           | 1                                  | 1                     | 4                         |
|                             | 7           | 0                                  | 0                     | 3                         |
|                             | 8           | 1                                  | 1                     | 4                         |
|                             | 9           | 0                                  | 0                     | 3                         |
| <b>Mean Score</b>           | <b>3.66</b> |                                    |                       |                           |

| Group                       | Animal      | Perivascular/vascular inflammation | Perivascular fibrosis | Smooth muscle hypertrophy |
|-----------------------------|-------------|------------------------------------|-----------------------|---------------------------|
| 3<br>PT2567<br>300mg<br>/kg | 1           | 0                                  | 0                     | 2                         |
|                             | 2           | 0                                  | 1                     | 4                         |
|                             | 3           | 1                                  | 1                     | 3                         |
|                             | 4           | 0                                  | 0                     | 2                         |
|                             | 5           | 0                                  | 0                     | 2                         |
|                             | 6           | 0                                  | 0                     | 2                         |
|                             | 7           | 0                                  | 0                     | 2                         |
|                             | 8           | 0                                  | 0                     | 2                         |
|                             | 9           | 0                                  | 0                     | 1                         |
| <b>Mean Score</b>           | <b>2.55</b> |                                    |                       |                           |

| Group                              | Animal      | Perivascular/vascular inflammation | Perivascular fibrosis | Smooth muscle hypertrophy |
|------------------------------------|-------------|------------------------------------|-----------------------|---------------------------|
| 4<br>Sildena<br>fil<br>30mg<br>/kg | 1           | 0                                  | 0                     | 2                         |
|                                    | 2           | 0                                  | 0                     | 3                         |
|                                    | 3           | 1                                  | 0                     | 4                         |
|                                    | 4           | 0                                  | 0                     | 3                         |
|                                    | 5           | 0                                  | 0                     | 4                         |
|                                    | 6           | 1                                  | 1                     | 4                         |
|                                    | 7           | 2                                  | 0                     | 4                         |
|                                    | 8           | 0                                  | 1                     | 3                         |
|                                    | 9           | 1                                  | 0                     | 4                         |
|                                    | 10          | 0                                  | 0                     | 3                         |
| <b>Mean Score</b>                  | <b>4.00</b> |                                    |                       |                           |
| 5<br>Nx<br>Control                 | 1           | 0                                  | 0                     | 0                         |
|                                    | 2           | 0                                  | 0                     | 0                         |
| <b>Mean Score</b>                  | <b>0</b>    |                                    |                       |                           |

The number represents the grade (0=normal, 1=minimal, 2=mild, 3=moderate, 4=marked) for each lesion/finding

Supplemental tables 1b Intervention-protocol pulmonary histology assessment

| Group               | Animal            | Perivascular/vascular inflammation | Perivascular fibrosis | Smooth muscle hypertrophy |
|---------------------|-------------------|------------------------------------|-----------------------|---------------------------|
| 1<br>Nx-<br>Vehicle | 1                 | 0                                  | 0                     | 0                         |
|                     | 2                 | 0                                  | 0                     | 0                         |
|                     | 3                 | 0                                  | 0                     | 1                         |
|                     | 4                 | 1                                  | 0                     | 1                         |
|                     | 5                 | 0                                  | 1                     | 0                         |
|                     | 6                 | 0                                  | 0                     | 0                         |
|                     | <b>Mean score</b> | <b>0.66</b>                        |                       |                           |

| Group            | Animal            | Perivascular/vascular inflammation | Perivascular fibrosis | Smooth muscle hypertrophy |
|------------------|-------------------|------------------------------------|-----------------------|---------------------------|
| 2<br>Su/Hx<br>3W | 1                 | 3                                  | 2                     | 2                         |
|                  | 2                 | 2                                  | 1                     | 2                         |
|                  | 3                 | 2                                  | 2                     | 3                         |
|                  | 4                 | 2                                  | 1                     | 2                         |
|                  | 5                 | 2                                  | 1                     | 2                         |
|                  | 6                 | 3                                  | 2                     | 3                         |
|                  | 7                 | 2                                  | 2                     | 2                         |
|                  | 8                 | 2                                  | 2                     | 2                         |
|                  | 9                 | 3                                  | 3                     | 3                         |
|                  | 10                | 3                                  | 2                     | 3                         |
|                  | <b>Mean Score</b> | <b>5.7</b>                         |                       |                           |

| Group                 | Animal            | Perivascular/vascular inflammation | Perivascular fibrosis | Smooth muscle hypertrophy |
|-----------------------|-------------------|------------------------------------|-----------------------|---------------------------|
| 3<br>Su/Hx<br>Vehicle | 1                 | 3                                  | 3                     | 4                         |
|                       | 2                 | 3                                  | 3                     | 2                         |
|                       | 3                 | 4                                  | 3                     | 4                         |
|                       | 4                 | 2                                  | 2                     | 3                         |
|                       | 5                 | 4                                  | 3                     | 2                         |
|                       | 6                 | 2                                  | 2                     | 2                         |
|                       | 7                 | 4                                  | 3                     | 4                         |
|                       | 8                 | 2                                  | 3                     | 4                         |
|                       | 9                 | 2                                  | 2                     | 3                         |
|                       | 10                | 3                                  | 3                     | 4                         |
|                       | <b>Mean Score</b> | <b>8.9</b>                         |                       |                           |

| Group                                 | Animal            | Perivascular/vascular inflammation | Perivascular fibrosis | Smooth muscle hypertrophy |
|---------------------------------------|-------------------|------------------------------------|-----------------------|---------------------------|
| 4<br>Su/Hx<br>PT2567<br>100mg/kg<br>9 | 1                 | 2                                  | 1                     | 1                         |
|                                       | 2                 | 1                                  | 1                     | 1                         |
|                                       | 3                 | 1                                  | 1                     | 1                         |
|                                       | 4                 | 2                                  | 2                     | 1                         |
|                                       | 5                 | 1                                  | 1                     | 2                         |
|                                       | 6                 | 0                                  | 1                     | 1                         |
|                                       | 7                 | 1                                  | 1                     | 1                         |
|                                       | 8                 | 2                                  | 1                     | 2                         |
|                                       | 9                 | 3                                  | 2                     | 3                         |
|                                       | 10                | 3                                  | 3                     | 4                         |
|                                       | <b>Mean Score</b> | <b>4.7</b>                         |                       |                           |

| Group                              | Animal | Perivascular/vascular inflammation | Perivascular fibrosis | Smooth muscle hypertrophy |
|------------------------------------|--------|------------------------------------|-----------------------|---------------------------|
| 5<br>Su/H<br>Sildenafil<br>30mg/kg | 1      | 2                                  | 2                     | 2                         |
|                                    | 2      | 2                                  | 1                     | 1                         |
|                                    | 3      | 4                                  | 2                     | 3                         |
|                                    | 4      | 3                                  | 2                     | 2                         |
|                                    | 5      | 2                                  | 2                     | 3                         |
|                                    | 6      | 2                                  | 2                     | 2                         |
|                                    | 7      | 2                                  | 2                     | 2                         |

|  |                   |            |   |   |
|--|-------------------|------------|---|---|
|  | 8                 | 2          | 1 | 1 |
|  | 9                 | 1          | 1 | 2 |
|  | 10                | 3          | 2 | 2 |
|  | <b>Mean Score</b> | <b>5.9</b> |   |   |

The number represents the grade (0=normal, 1=minimal, 2=mild, 3=moderate, 4=marked) for each lesion/finding
